# Supplementary material
Source: MDPI journal article supplement (https://www.mdpi.com/2075-4701/9/2/227)
Supplement: s1 [file s1]

Article

# Adsorption Energy Shifts for Oxygen and Hydroxyl on 4-atom Metal-Decorated Graphene Catalysts Via Solvation, pH, and Substrate Dopants: Effects on ORR Activity

Rees B Rankin \* and Tamara Lozano

Department of Chemical Engineering, Villanova University, White Hall 313, 800 E Lancaster Ave, Villanova, 19085, PA, USA; tlozano@villanova.edu

\* Correspondence: rb.rankin@villanova.edu; Tel.: +610-519-6206

Received: 15 December 2018; Accepted: 2 February 2019; Published: date

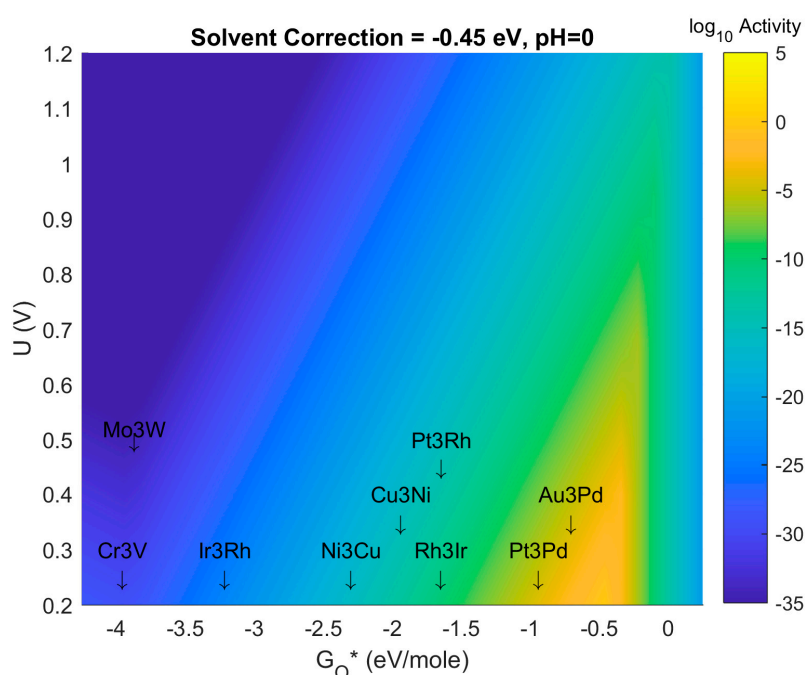

**Figure SI 1a.** Zoomed in From Figure 6 of Main Document Volcano Plot analysis for ORR activity at solvent correction value of -0.45 eV. **Top left** (pH = 0), Top right (pH = 1), Bottom left (pH = 3), Bottom right (pH = 7). Blue denotes lowest activity, yellow denotes highest activity. All plots use same color-axis scale hence some saturation at maximum activity and minimum activity. Activity given in log10 scale to show more detail in plot.

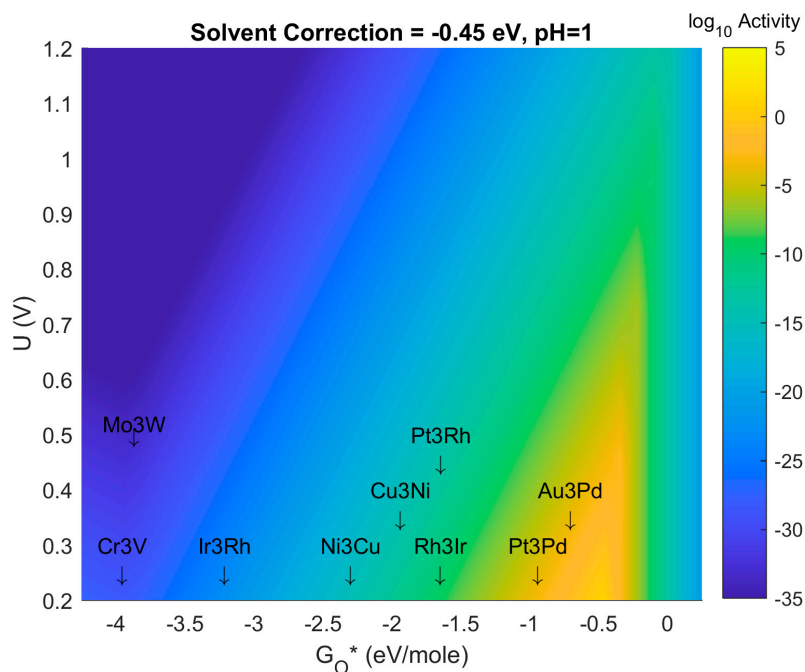

**Figure SI 1b.** Zoomed in From Figure 6 of Main Document Volcano Plot analysis for ORR activity at solvent correction value of -0.45 eV. Top left (pH = 0), **Top right** (pH = 1), Bottom left (pH = 3), Bottom right (pH = 7). Blue denotes lowest activity, yellow denotes highest activity. All plots use same color-axis scale hence some saturation at maximum activity and minimum activity. Activity given in log10 scale to show more detail in plot.

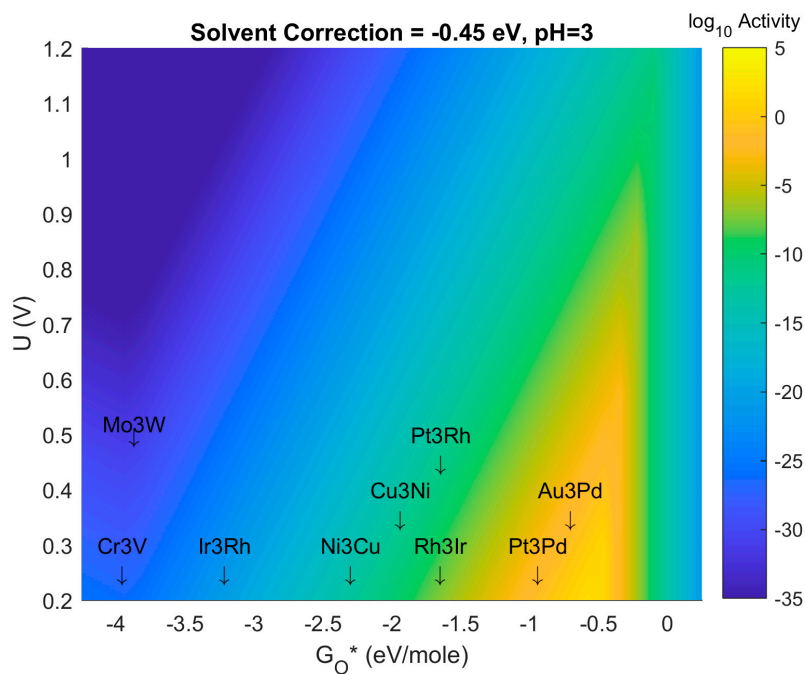

**Figure SI 1c.** Zoomed in From Figure 6 of Main Document Volcano Plot analysis for ORR activity at solvent correction value of -0.45 eV. Top left (pH = 0), Top right (pH = 1), **Bottom left** (pH = 3), Bottom right (pH = 7). Blue denotes lowest activity, yellow denotes highest activity. All plots use same color-axis scale hence some saturation at maximum activity and minimum activity. Activity given in log10 scale to show more detail in plot.

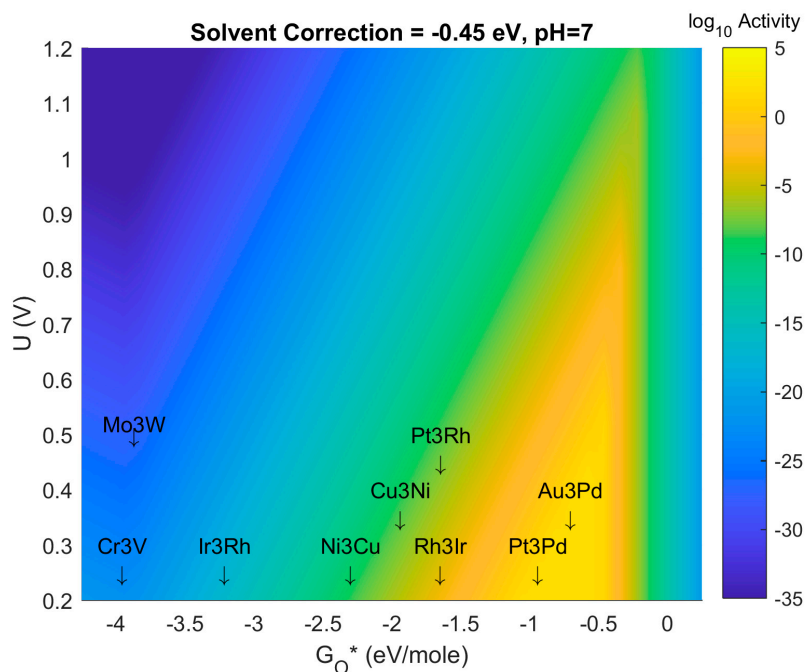

**Figure SI 1d.** Zoomed in From Figure 6 of Main Document Volcano Plot analysis for ORR activity at solvent correction value of  $-0.45$  eV. Top left (pH = 0), Top right (pH = 1), Bottom left (pH = 3), **Bottom right** (pH = 7). Blue denotes lowest activity, yellow denotes highest activity. All plots use same color-axis scale hence some saturation at maximum activity and minimum activity. Activity given in log10 scale to show more detail in plot.

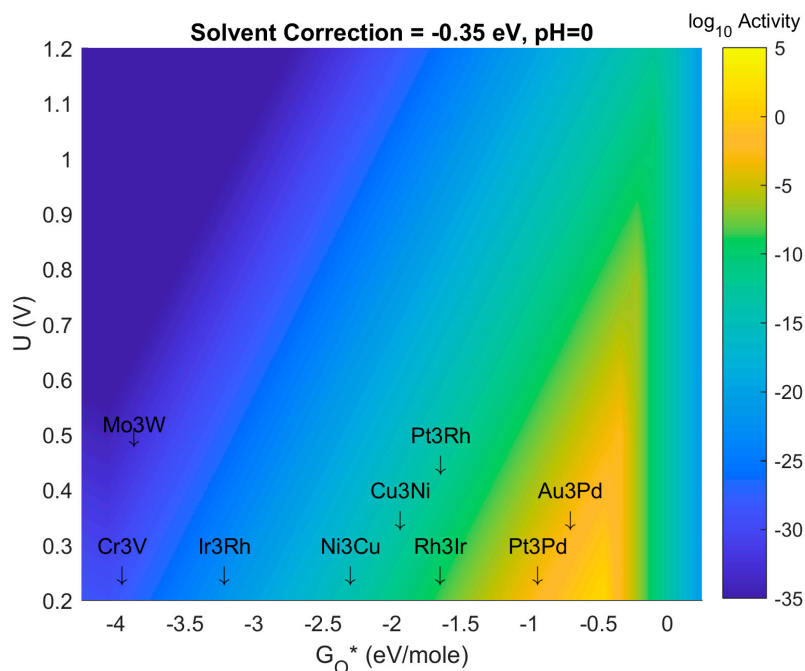

**Figure SI 2a.** Zoomed in From Figure 7 of Main Document Volcano Plot analysis for ORR activity at solvent correction value of  $-0.35$  eV. **Top left** (pH = 0), Top right (pH = 1), Bottom left (pH = 3), Bottom right (pH = 7). Blue denotes lowest activity, yellow denotes highest activity. All plots use same color-axis scale hence some saturation at maximum activity and minimum activity. Activity given in log10 scale to show more detail in plot.

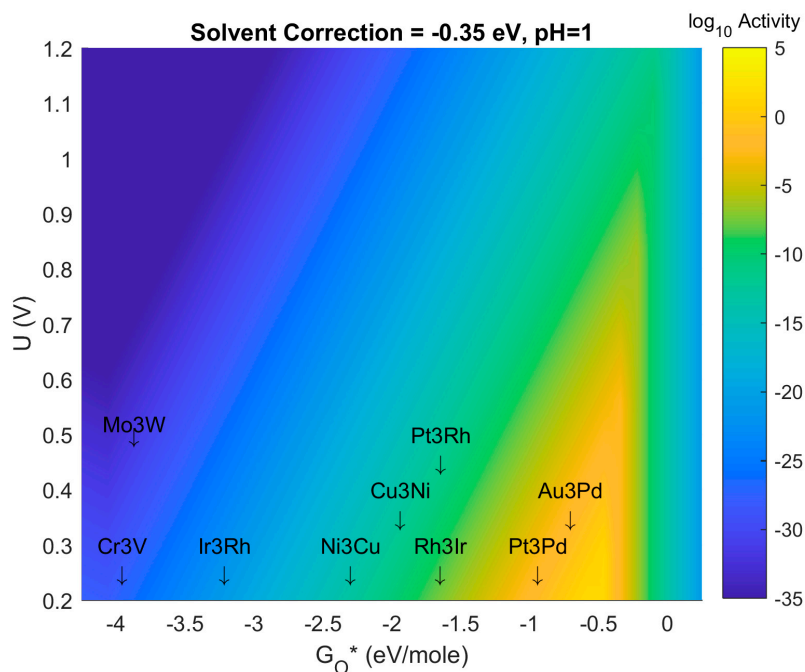

**Figure SI 2b.** Zoomed in From Figure 7 of Main Document Volcano Plot analysis for ORR activity at solvent correction value of -0.35 eV. Top left (pH = 0), **Top right** (pH = 1), Bottom left (pH = 3), Bottom right (pH = 7). Blue denotes lowest activity, yellow denotes highest activity. All plots use same color-axis scale hence some saturation at maximum activity and minimum activity. Activity given in log10 scale to show more detail in plot.

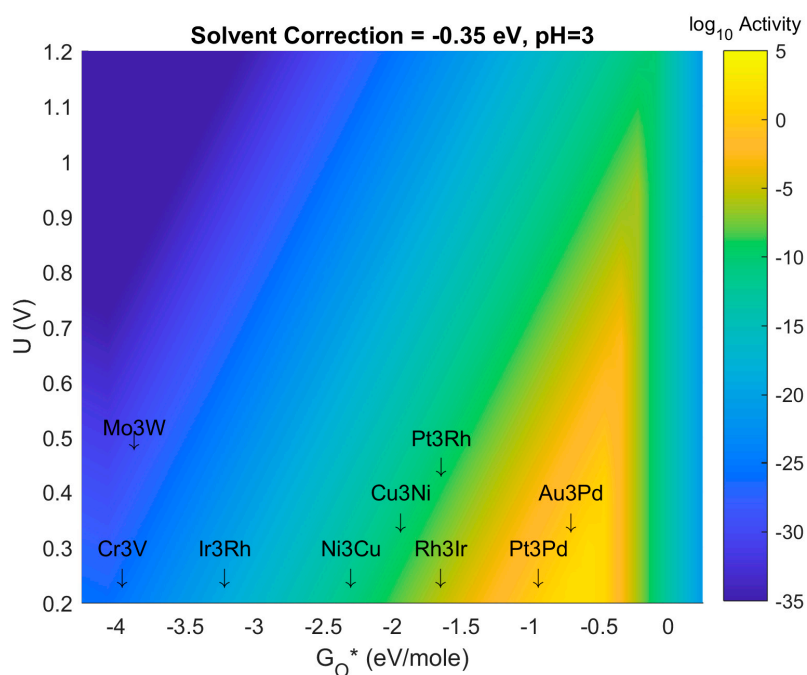

**Figure SI 2c.** Zoomed in From Figure 7 of Main Document Volcano Plot analysis for ORR activity at solvent correction value of -0.35 eV. Top left (pH = 0), Top right (pH = 1), **Bottom left** (pH = 3), Bottom right (pH = 7). Blue denotes lowest activity, yellow denotes highest activity. All plots use same color-axis scale hence some saturation at maximum activity and minimum activity. Activity given in log10 scale to show more detail in plot.

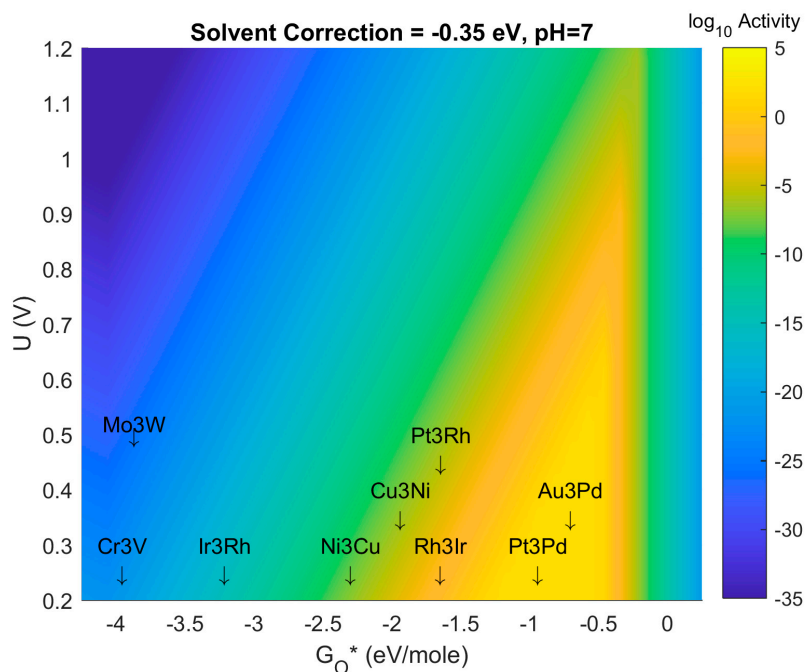

Figure SI 2d. Zoomed in From Figure 7 of Main Document Volcano Plot analysis for ORR activity at solvent correction value of  $-0.35$  eV. Top left (pH = 0), Top right (pH = 1), Bottom left (pH = 3), **Bottom right** (pH = 7). Blue denotes lowest activity, yellow denotes highest activity. All plots use same color-axis scale hence some saturation at maximum activity and minimum activity. Activity given in  $\log_{10}$  scale to show more detail in plot.

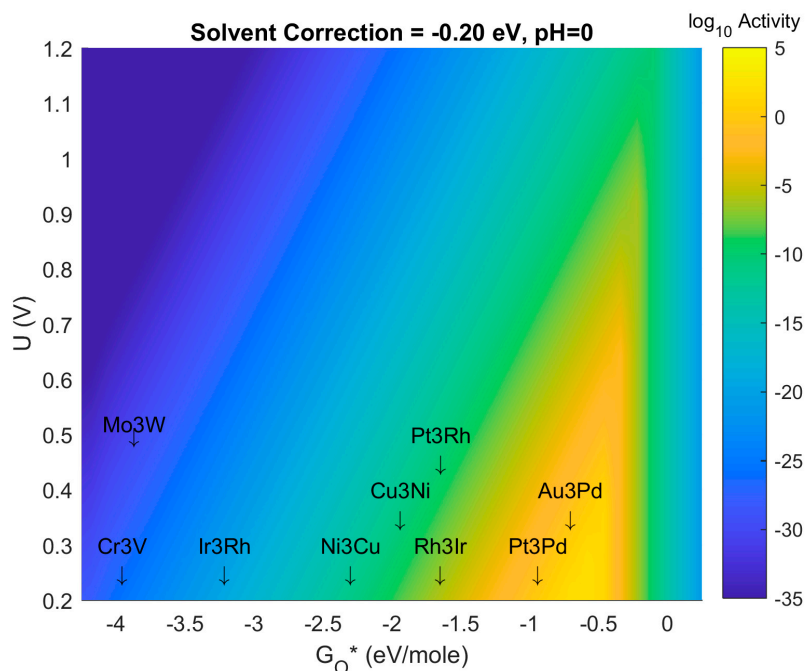

**Figure SI 3a.** Zoomed in From Figure 8 of Main Document Volcano Plot analysis for ORR activity at solvent correction value of  $-0.20$  eV. **Top left** (pH = 0), Top right (pH = 1), Bottom left (pH = 3), Bottom right (pH = 7). Blue denotes lowest activity, yellow denotes highest activity. All plots use same color-axis scale hence some saturation at maximum activity and minimum activity. Activity given in  $\log_{10}$  scale to show more detail in plot.

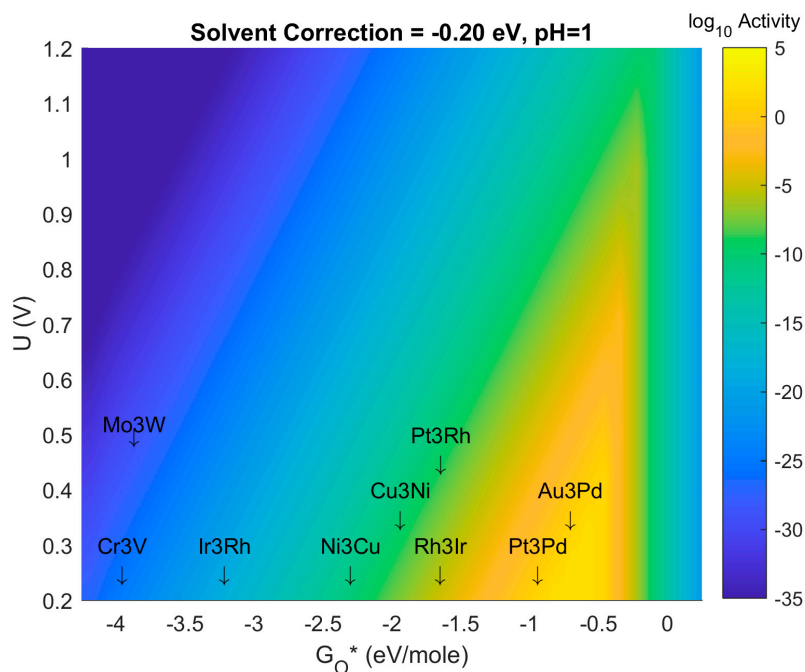

**Figure SI 3b.** Zoomed in From Figure 8 of Main Document Volcano Plot analysis for ORR activity at solvent correction value of -0.20 eV. Top left (pH = 0), **Top right** (pH = 1), Bottom left (pH = 3), Bottom right (pH = 7). Blue denotes lowest activity, yellow denotes highest activity. All plots use same color-axis scale hence some saturation at maximum activity and minimum activity. Activity given in log10 scale to show more detail in plot.

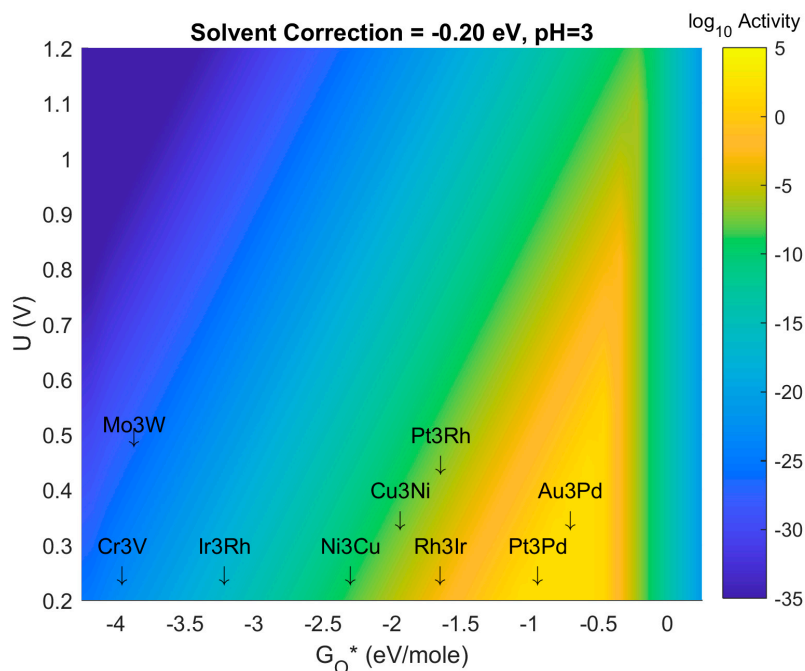

**Figure SI 3c.** Zoomed in From Figure 8 of Main Document Volcano Plot analysis for ORR activity at solvent correction value of -0.20 eV. Top left (pH = 0), Top right (pH = 1), **Bottom left** (pH = 3), Bottom right (pH = 7). Blue denotes lowest activity, yellow denotes highest activity. All plots use same color-axis scale hence some saturation at maximum activity and minimum activity. Activity given in log10 scale to show more detail in plot.

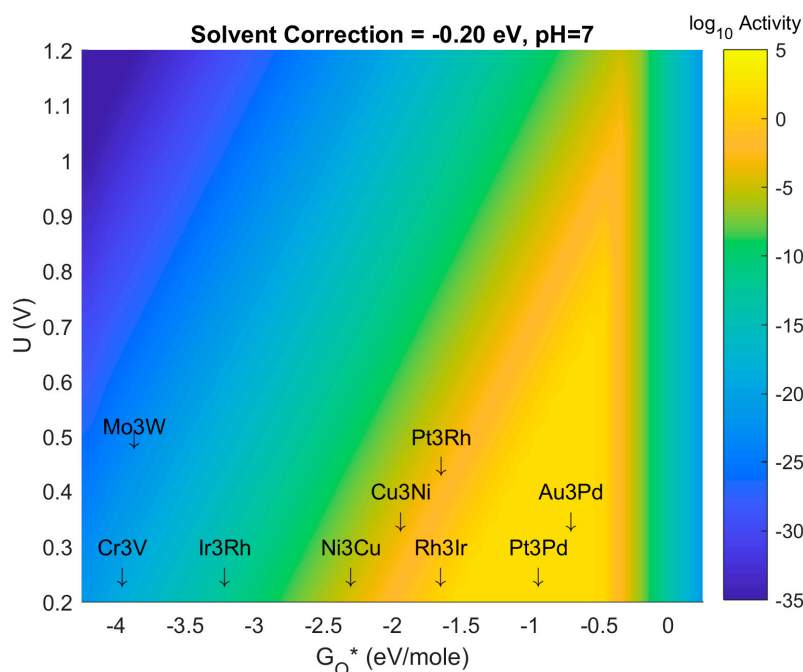

**Figure SI 3d.** Zoomed in From Figure 8 of Main Document Volcano Plot analysis for ORR activity at solvent correction value of  $-0.20$  eV. Top left (pH = 0), Top right (pH = 1), Bottom left (pH = 3), **Bottom right** (pH = 7). Blue denotes lowest activity, yellow denotes highest activity. All plots use same color-axis scale hence some saturation at maximum activity and minimum activity. Activity given in  $\log_{10}$  scale to show more detail in plot.

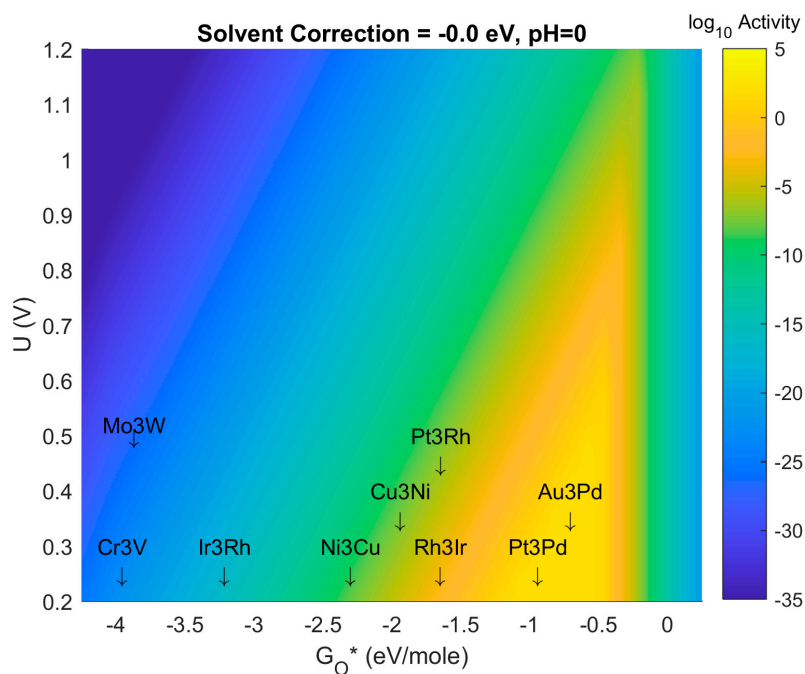

**Figure SI 4a.** Zoomed in From Figure 9 of Main Document Volcano Plot analysis for ORR activity at solvent correction value of  $-0.00$  eV. **Top left** (pH = 0), Top right (pH = 1), Bottom left (pH = 3), Bottom right (pH = 7). Blue denotes lowest activity, yellow denotes highest activity. All plots use same color-axis scale hence some saturation at maximum activity and minimum activity. Activity given in  $\log_{10}$  scale to show more detail in plot.

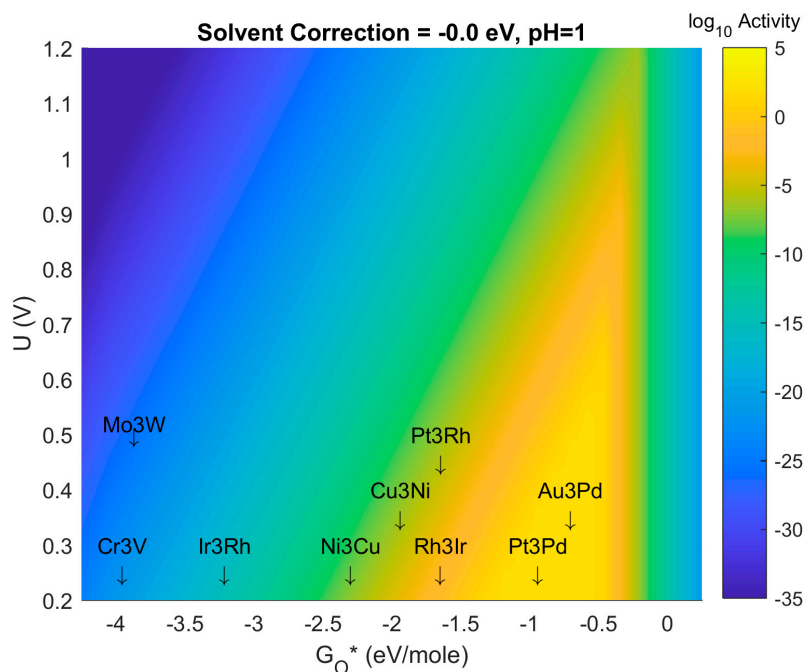

**Figure SI 4b.** Zoomed in From Figure 9 of Main Document Volcano Plot analysis for ORR activity at solvent correction value of -0.00 eV. Top left (pH = 0), **Top right** (pH = 1), Bottom left (pH = 3), Bottom right (pH = 7). Blue denotes lowest activity, yellow denotes highest activity. All plots use same color-axis scale hence some saturation at maximum activity and minimum activity. Activity given in log<sub>10</sub> scale to show more detail in plot.

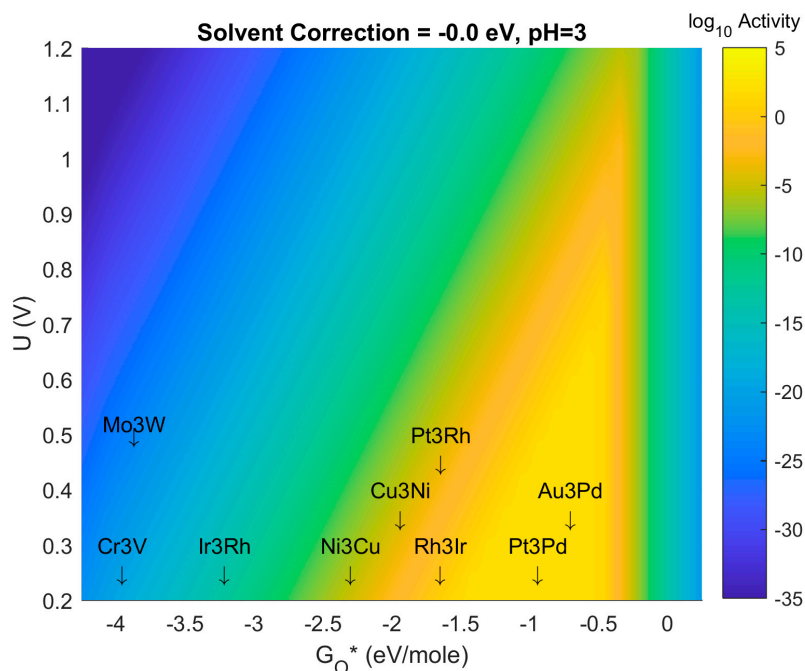

**Figure SI 4c.** Zoomed in From Figure 9 of Main Document Volcano Plot analysis for ORR activity at solvent correction value of -0.00 eV. Top left (pH = 0), Top right (pH = 1), **Bottom left** (pH = 3), Bottom right (pH = 7). Blue denotes lowest activity, yellow denotes highest activity. All plots use same color-axis scale hence some saturation at maximum activity and minimum activity. Activity given in log<sub>10</sub> scale to show more detail in plot.

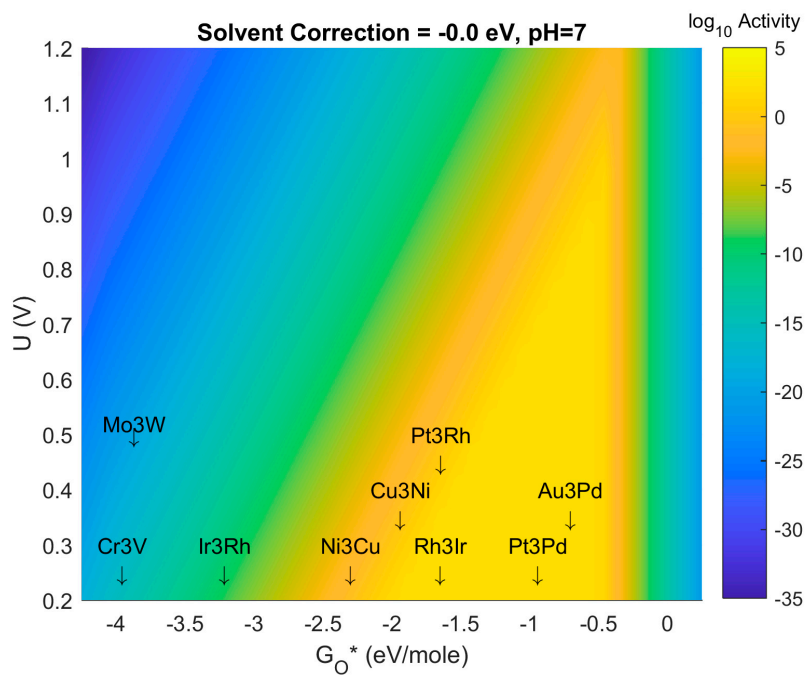

**Figure SI 4d.** Zoomed in From Figure 9 of Main Document Volcano Plot analysis for ORR activity at solvent correction value of  $-0.00$  eV. Top left (pH = 0), Top right (pH = 1), Bottom left (pH = 3), **Bottom right** (pH = 7). Blue denotes lowest activity, yellow denotes highest activity. All plots use same color-axis scale hence some saturation at maximum activity and minimum activity. Activity given in  $\log_{10}$  scale to show more detail in plot.
